# Supplementary material for: Resveratrol and Other Natural Oligomeric Stilbenoid Compounds and Their Therapeutic Applications
Source: MDPI journal article supplement (doi:10.3390/plants12162935), 2023-08-14
Supplement: s1 [file s1]

Review

# Resveratrol and Other Natural Oligomeric Stilbenoid Compounds and Their Therapeutic Applications

Cosmina-Gabriela Duta-Bratu, George Mihai Nitulescu \*, Dragos Paul Mihai \* and Octavian Tudorel Olaru

Faculty of Pharmacy, “Carol Davila” University of Medicine and Pharmacy, Traian Vuia 6, 020956 Bucharest, Romania

## Supplementary Material

**Table S1.** Representative families and genera of plants containing oligomeric stilbenoid compounds.

| Plant Family         | Representative Genus  |
|----------------------|-----------------------|
| Gnetaceae [1,2]      | <i>Gnetum</i>         |
| Pinaceae [3,4]       | <i>Pinus</i>          |
|                      | <i>Picea</i>          |
| Moraceae [5,6]       | <i>Morus</i>          |
|                      | <i>Artocarpus</i>     |
| Polygonaceae [7][8]  | <i>Rheum</i>          |
|                      | <i>Polygonum</i>      |
|                      | <i>Macaranga</i>      |
| Euphorbiaceae [9–11] | <i>Vitis</i>          |
| Vitaceae [1,8]       | <i>Ampelopsis</i>     |
|                      | <i>Cayratia</i>       |
|                      | <i>Cissus</i>         |
|                      | <i>Cyphostemma</i>    |
|                      | <i>Rhoicissus</i>     |
|                      | <i>Muscadinia</i>     |
|                      | <i>Parthenocissus</i> |
|                      | <i>Lonchocarpus</i>   |
|                      | <i>Pterocarpus</i>    |
|                      | <i>Vaccinium</i>      |
| Ericaceae [13]       | <i>Gaylussacia</i>    |
|                      | <i>Carex</i>          |
| Cyperaceae [14]      | <i>Cyperus</i>        |
|                      | <i>Carpha</i>         |
|                      | <i>Kobresia</i>       |
|                      | <i>Scirpus</i>        |

## References

1. Rivière, C.; Pawlus, A. D.; Mérillon, J. M. Natural stilbenoids: Distribution in the plant kingdom and chemotaxonomic interest in Vitaceae. *Nat. Prod. Rep.* **2012**, *29*, 1317–1333.
2. Teka, T.; Zhang, L.; Ge, X.; Li, Y.; Han, L.; Yan, X. Stilbenes: Source plants, chemistry, biosynthesis, pharmacology, application and problems related to their clinical Application-A comprehensive review. *Phytochemistry* **2022**, *197*, 113128.
3. Valletta, A.; Iozia, L. M.; Leonelli, F. Impact of Environmental Factors on Stilbene Biosynthesis. *Plants* **2021**, *10*.
4. Jyske, T.; Brännström, H.; Halmemies, E.; Laakso, T.; Kilpeläinen, P.; Hyvönen, J.; Kärkkäinen, K.; Saranpää, P. Stilbenoids of Norway spruce bark: does the variability caused by raw-material processing offset the biological variability? *Biomass Convers. Biorefinery* **2022**.

5. Arslan, G.; Yilmaz, N. Determination of Trans-resveratrol levels in different fruits, vegetables and their skin by HPLC. *Asian J. Chem.* **2013**, *25*, 1225–1228.
6. Boonlaksiri, C.; Oonanant, W.; Kongsaree, P.; Kittakoo, P.; Tanticharoen, M.; Thebtaranonth, Y. An antimalarial stilbene from *Artocarpus integer*. *Phytochemistry* **2000**, *54*, 415–417.
7. Zheng, Q.; Wu, H.; Guo, J.; Nan, H.; Chen, S.; Yang, J.; Xu, X. Review of Rhubarbs: Chemistry and Pharmacology. *Chinese Herb. Med.* **2013**, *5*, 9–32.
8. Su, X.; Zhou, D.; Li, N. Chapter 8 - Bioactive stilbenes from plants. In; Atta-ur-Rahman, B. T.-S. in N. P. C., Ed.; Elsevier, 2022; Vol. 73, pp. 265–403.
9. van der Kaaden, J. E.; Hemscheidt, T. K.; Mooberry, S. L. Mappain, a New Cytotoxic Prenylated Stilbene from *Macaranga mappia*. *J. Nat. Prod.* **2001**, *64*, 103–105.
10. Jang, D. S.; Cuendet, M.; Hawthorne, M. E.; Kardono, L. B. S.; Kawanishi, K.; Fonga, H. H. S.; Mehta, R. G.; Pezzuto, J. M.; Kinghorn, A. D. Prenylated flavonoids of the leaves of *Macaranga conifera* with inhibitory activity against cyclooxygenase-2. *Phytochemistry* **2002**, *61*, 867–872.
11. Beutler, J. A.; Jato, J.; Cragg, G. M.; Boyd, M. R. Schweinfurthin D, a cytotoxic stilbene from *Macaranga schweinfurthii*. *Nat. Prod. Lett.* **2000**, *14*, 399–404.
12. Ioset, J.-R.; Marston, A.; Gupta, M. P.; Hostettmann, K. Five New Prenylated Stilbenes from the Root Bark of *Lonchocarpus chiricanus*. *J. Nat. Prod.* **2001**, *64*, 710–715.
13. Liu, Y.; You, Y.; Lu, J.; Chen, X.; Yang, Z. Recent Advances in Synthesis, Bioactivity, and Pharmacokinetics of Pterostilbene, an Important Analog of Resveratrol. *Molecules* **2020**, *25*.
14. Dávid, C. Z.; Hohmann, J.; Vasas, A. Chemistry and Pharmacology of Cyperaceae Stilbenoids: A Review. *Molecules* **2021**, *26*.

**Disclaimer/Publisher's Note:** The statements, opinions and data contained in all publications are solely those of the individual author(s) and contributor(s) and not of MDPI and/or the editor(s). MDPI and/or the editor(s) disclaim responsibility for any injury to people or property resulting from any ideas, methods, instructions or products referred to in the content.
